# Supplementary material
Source: publisher figshare collection journal article supplement (https://frontiersin.figshare.com/ndownloader/files/28706964)
Supplement: Supplementary file 1 [file 28706964]

Supplementary Material

Supplementary Table 4. The correlation coefficient of means separated by Fisher’s LSD for treated accessions. A) Complete submergence stress treated accessions height reduction 14 days after treatment (DAT), B) Complete submergence stress treated accessions height reduction 28 days after treatment (DAT), and C) Complete submergence stress treated accessions mean biomass reduction 28 days after treatment (DAT).

A)

An * is significant at P = 0.05; values without asterisk are not significant.

Supplementary Material

B)

An * is significant at P = 0.05; values without asterisk are not significant.

Supplementary Material

C)

An * is significant at P = 0.05; values without asterisk are not significant.
